# Supplementary material for: Effect of post-annealing on the plasma etching of graphene-coated-copper
Source: Royal Society of Chemistry journal article supplement (doi:10.1039/c4fd00118d), 2014-01-01
Supplement: c4fd00118d1.pdf [file c4fd00118d1.pdf]

SUPPLEMENTARY INFORMATION

## Effect of Post-Annealing on Plasma Etching of graphene-coated-copper

L. S. Hui <sup>a</sup>, E. Whiteway <sup>b</sup>, M. Hilke <sup>b</sup> and A. Turak <sup>a</sup>

### Supplementary information

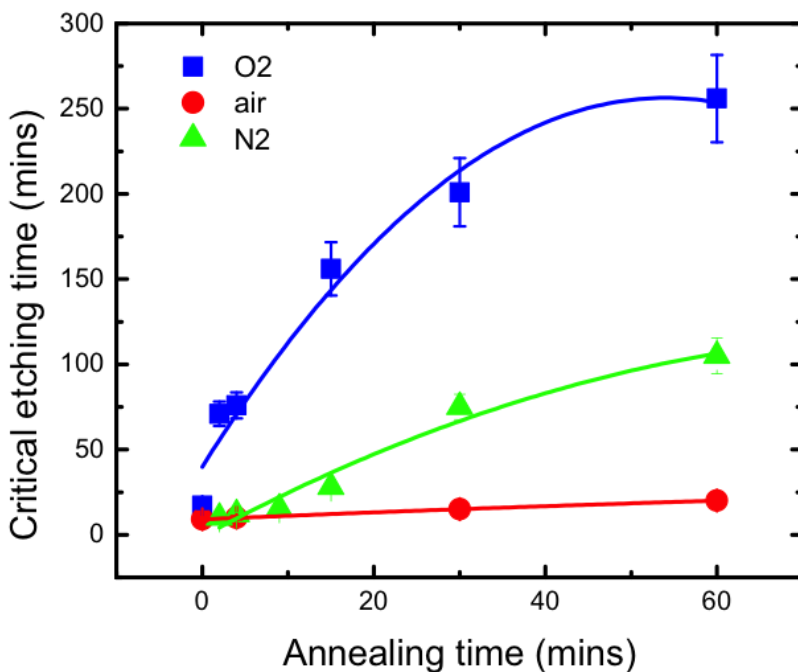

Figure 1 Critical etching times in mins for each process gas

## SUPPLEMENTARY INFORMATION

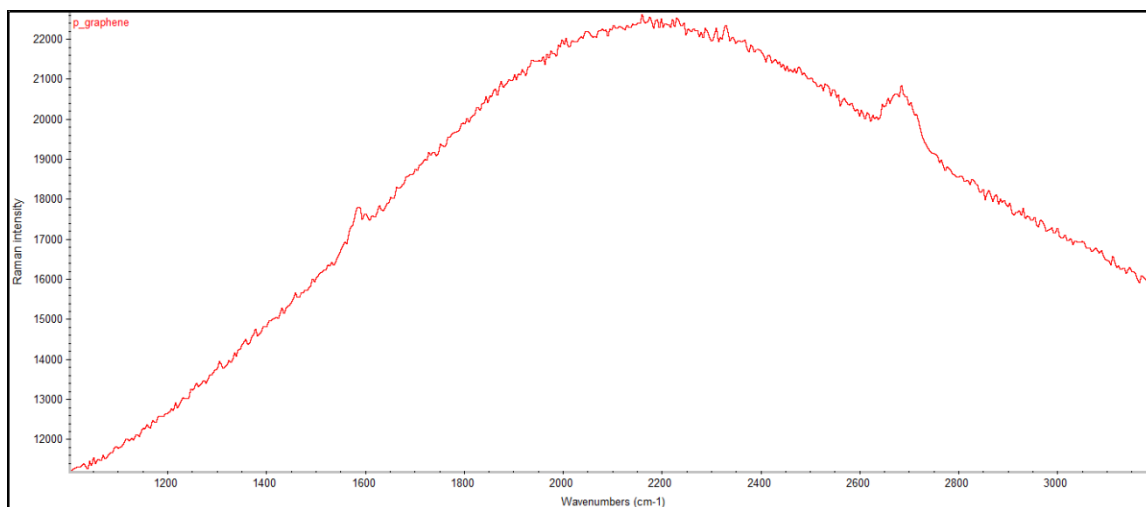

Figure 2a Raw Raman data for pristine graphene

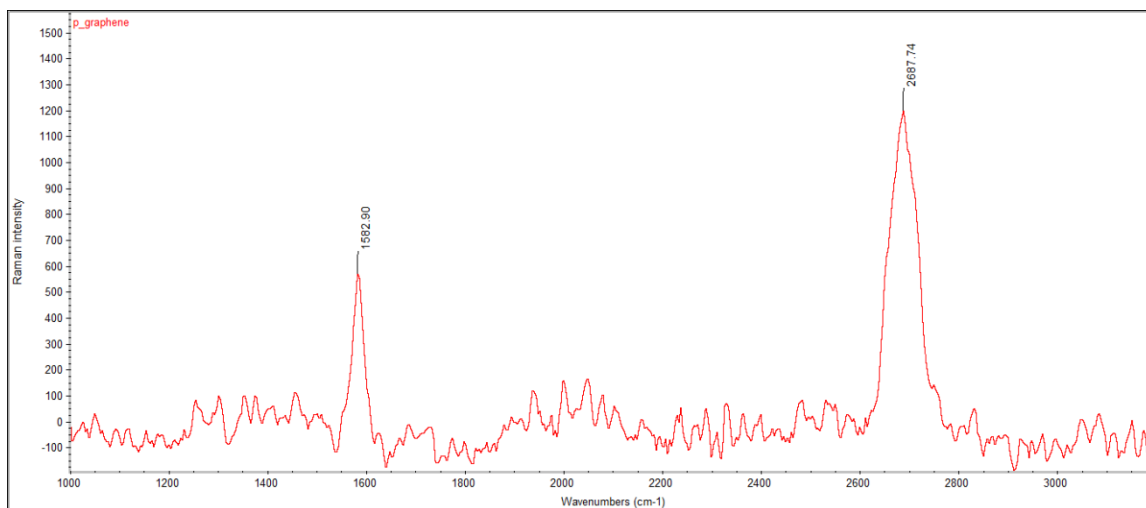

Figure 2b Raman data for pristine graphene after baseline correction of Cu
